# Supplementary material
Source: ML conference proceedings conference paper supplement (https://openreview.net/forum?id=nl0RDZvtHn)
Supplement: supplementary_material [file supp.pdf › supp.pdf]

# Few-Shot Pattern Detection via Template Matching and Regression

## Supplementary Material

In this supplementary material, we provide additional experimental results and analysis to support our method, including qualitative results.

### 8. Additional details

#### 8.1. Detailed model architecture

We provide the details of the model architecture in Tab. 10. We design our model architecture to be as simple as possible, and there are only 5 learnable layers in total.

| module              | structure                         | # params. |
|---------------------|-----------------------------------|-----------|
| backbone projection | linear(in=256, out=512)           | 0.13M     |
| box regressor       | conv(k=(3, 3), in=1024, out=1024) | 9.44M     |
|                     | LeakyReLU                         | 0         |
|                     | linear(in=1024, out=4)            | 4096      |
| presence classifier | conv(k=(3, 3), in=1024, out=1024) | 9.44M     |
|                     | LeakyReLU                         | 0         |
|                     | linear(in=1024, out=1)            | 1024      |

Table 10. The total learnable layers in TMR. We exclude the feature backbone parameters that are frozen. The “k” in the table denotes the 2D convolution kernel size.

#### 8.2. Template extraction details

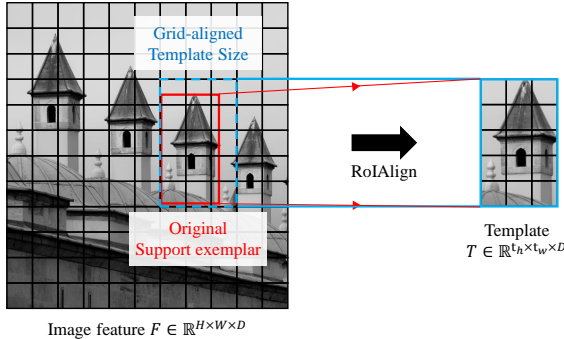

Figure 8. Using RoIAlign, the template  $T$  (blue box) is extracted by adaptively determining its size  $(t_h, t_w)$  (blue dashed box) to fully cover the support exemplar’s region (red box) on  $F$ , which preserves spatial alignment between  $F$  and  $T$ .

Prior methods typically use Global Average Pooling or RoIAlign to produce fixed-size prototypes. However, these approaches can lead to spatial misalignment between the feature map  $F$  and the template  $T$ , which degrades template matching performance. As shown in Fig. 8, we address this issue by adaptively determining the template size  $(t_h, t_w)$  based on the support exemplar’s region on  $F$  (red box), rounding it up to the smallest grid-aligned region

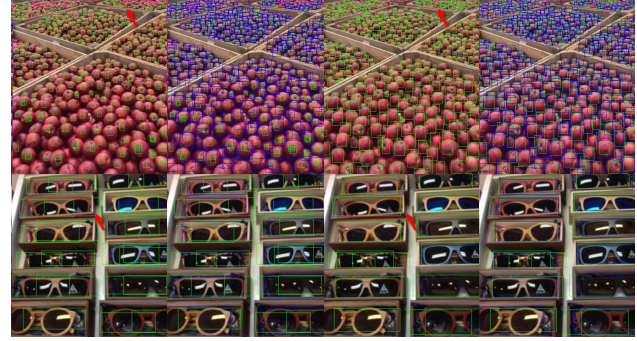

prototype matching  $[F; F_{PM}]$       template matching  $[F; F_{TM}]$

Figure 9. Noticeable failure cases of prototype matching. Prototypes collapse the geometric layout of the exemplars, being especially vulnerable for localizing instances among dense repetition or patterns including sub-patterns.

that fully contains the support exemplar’s area (blue dashed box). Using this size, we apply RoIAlign to extract a spatially aligned template (blue box), enabling more precise and consistent template matching.

#### 8.3. Dataset details

**FSCD-147** extends FSC-147 [60] dataset, which includes only dot annotations for objects, to include bounding box annotations. It covers 147 object categories with additional bounding box annotation. **FSCD-LVIS** includes more complex scenes with multiple object classes, each containing multiple instances, compared to FSCD-147, where each image has a relatively simple scene. Regardless, FSCD-LVIS is still annotated with a single pattern per image unlike RPINE that is annotated with multiple existing pattern classes.

### 9. Additional experimental details

**Failure cases of prototype-matching models.** Figure 9 visualizes the noticeable failure cases of the prototype matching method in replace of our template matching.

**Failure cases of TMR.** We analyze the failure cases of TMR, as shown in Fig. 10. In the first row of Fig. 10, TMR often fails to detect highly crowded patterns when the support exemplar is extremely small. In the second row, the model struggles with highly textured patterns that exhibit large variations in texture appearance. These examples suggest potential directions for improvement, such as incorporating multi-scale representations with much higher resolution features and designing pattern-specific backbones to reduce noise caused by texture variation.

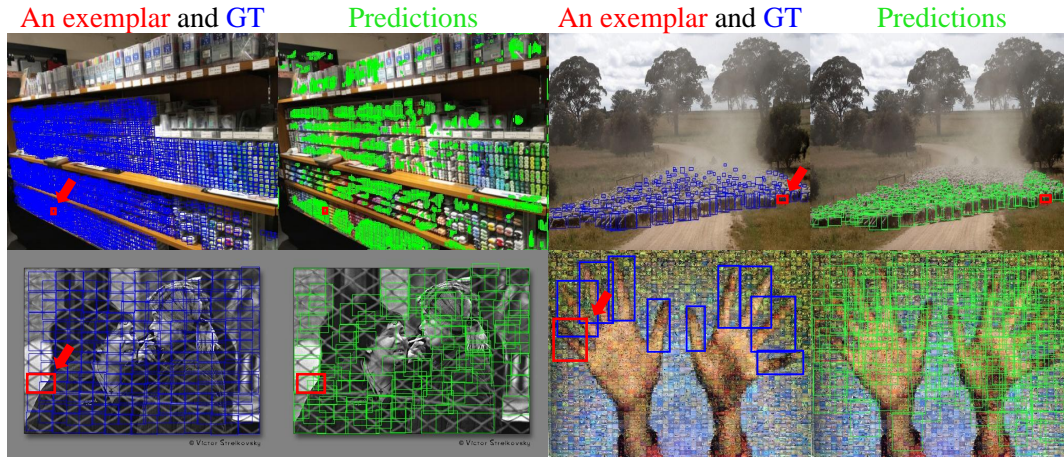

Figure 10. Qualitative analysis of failure cases in TMR.

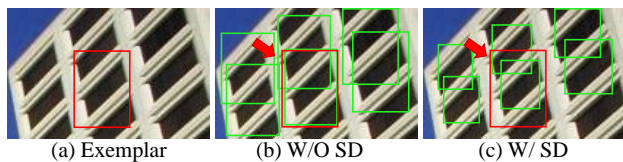

Figure 11. Additional failure case of SAM decoder.

| Type         | Scales          |                 |                  | AP           | AP50         | AP75         |
|--------------|-----------------|-----------------|------------------|--------------|--------------|--------------|
|              | 32 <sup>2</sup> | 64 <sup>2</sup> | 128 <sup>2</sup> |              |              |              |
| Single-Scale |                 | ✓               |                  | 27.49        | 56.15        | 23.25        |
|              |                 |                 | ✓                | 33.59        | 64.05        | 30.52        |
| Multi-Scales | ✓               |                 | ✓                | 34.03        | 64.86        | 31.66        |
|              |                 | ✓               | ✓                | 34.78        | 66.71        | 31.51        |
|              | ✓               | ✓               | ✓                | <b>35.41</b> | <b>66.88</b> | <b>32.52</b> |

Table 11. Multi-scales experiment of TMR on RPINE. The gray-shaded row indicates the default single-scale configuration described in Sec. 4, where only a single feature scale is used. For the single-scale setting, upscaling the feature map from  $64 \times 64$  to  $128 \times 128$  improves performance, as the resulting higher-resolution correlation map enables denser predictions.

**Additional analysis of SAM decoder’s (SD) failures.** To support our main analysis in Sec. 6.4, we provide additional qualitative example highlighting the limitations of the SAM decoder (SD) in handling non-object patterns. As shown in Fig. 11, although the exemplar includes both the window and decoration around the window sills, the refined prediction closely aligns with the black window frames, missing the broader structure present in the exemplar. This edge-sensitive behavior of SD is consistent with the findings in the Sec. 7.2 of the SAM paper [27], which reports that SD produces high-recall edge maps even without explicit edge supervision.

**Qualitative results on FSCD-147, FSCD-LVIS and RPINE.** We provide additional qualitative results on the FSCD-147, FSCD-LVIS and RPINE dataset in Figs. 14, Figs. 13 and 15 to show the model’s effectiveness. As shown in Fig. 14, our method effectively detects the given exemplar. For instance, in the first row, TMR successfully identifies all instances of the given exemplar, whereas other state-of-the-art models either fail to detect some instances or produce false positives. Furthermore, TMR successfully detects non-object patterns, as shown in the penultimate row of Fig. 15.

**Multi-scale extension.** TMR can be naturally extended to multi-scale prediction by incorporating a multi-scale architecture, such as ViTDet [31]. Following a similar approach to the few-shot extension in Sec. 4.3, we first extract feature maps at multiple scales and independently apply the

prediction process to each scale. The resulting predictions are then aggregated and filtered using Non-Maximum Suppression (NMS) to remove duplicates across scales. As shown in Tab. 11, leveraging multi-scale features yields further performance improvements, demonstrating the benefit of scale-aware detection in capturing pattern instances of varying sizes. For a fair comparison with prior state-of-the-art methods [25, 56], we use the single-scale setting in all experiments, except for the multi-scale experiment reported in Tab. 11.

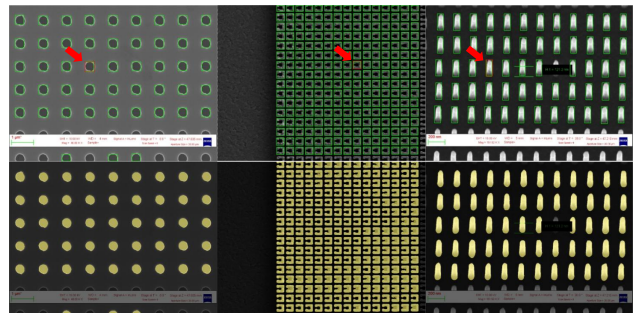

Figure 12. Additional qualitative results of detection and segmentation on the SEM dataset [1].

## 10. Future work

**Rotation invariance.** Although TMR effectively handles scale variations, achieving rotation invariance remains a challenging problem, as observed in prior approaches as well [25, 56]. This limitation could be further mitigated by incorporating rotation-invariant data augmentation or adopting rotation-equivariant architectures [4, 58].

**Applications.** The proposed template-matching based detection framework is potentially useful for detecting low-semantic, user-defined patterns. One interdisciplinary application is flow cytometry [14, 57], which analyzes the physical and chemical characteristics of cell or particle populations[3, 44], such as in cell counting tasks. We also evaluate TMR on scanning electron microscope (SEM) images [1], which are widely used in fields such as micro-processor inspection, and find that it performs reasonably well (Fig. 12). Since repetitive patterns are a fundamental component of many natural and artificial structures [11, 29], the framework could be extended to broader applications in real-world settings, such as agricultural or industrial vision. A thorough investigation of these directions is beyond the scope of this study and is left for future work.



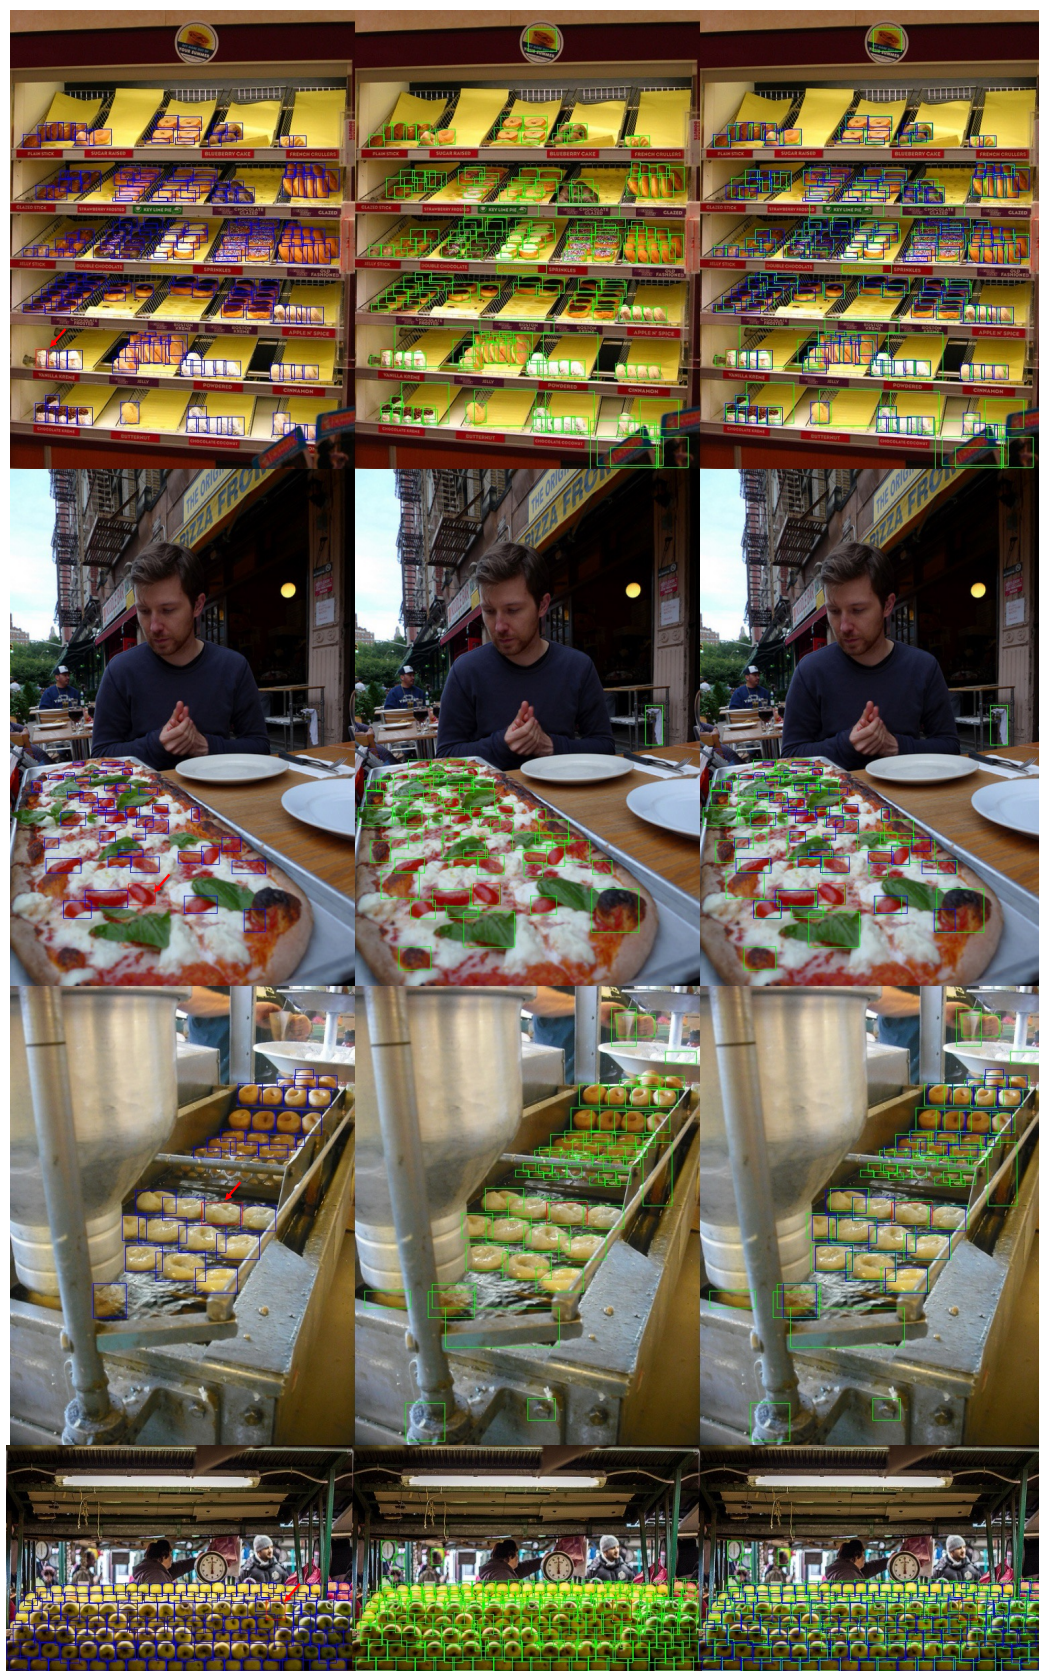

An exemplar and GT

TMR (ours)

TMR (ours) and GT

Figure 13. Additional qualitative results on the FSCD-LVIS dataset.

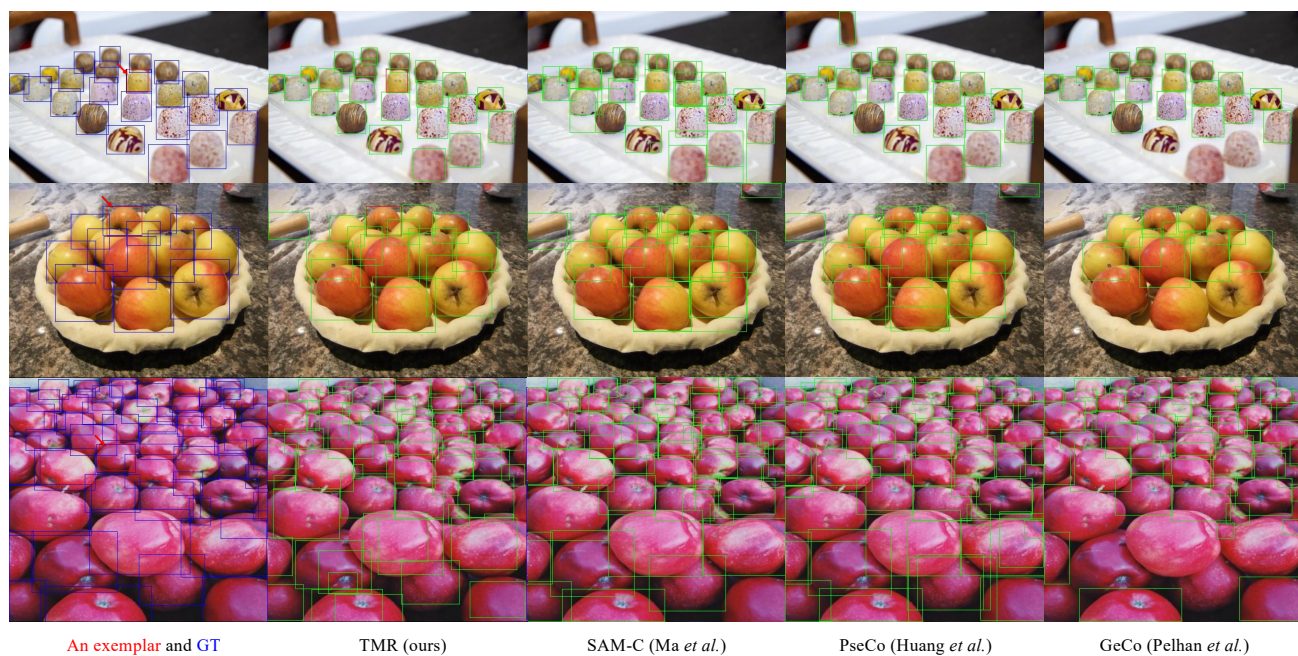

Figure 14. Additional qualitative results on the FSCD-147 dataset.



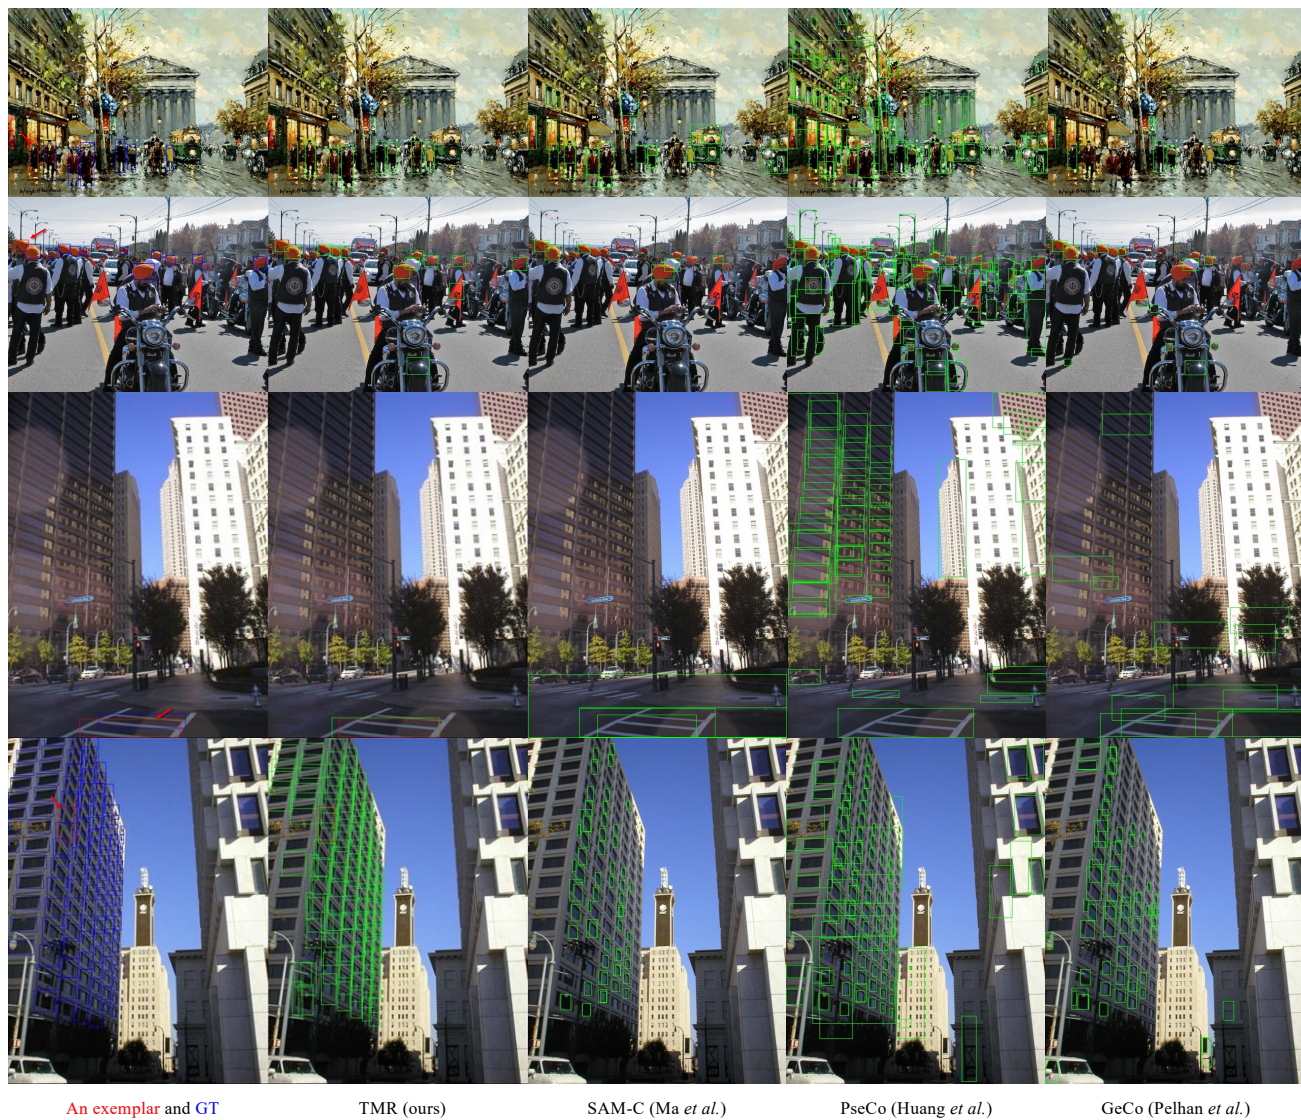

Figure 15. Additional qualitative results on the RPINE dataset.
